# Supplementary material for: Carvacrol Selective Pressure Allows the Occurrence of Genetic Resistant Variants of Listeria monocytogenes EGD-e
Source: MDPI journal article supplement (doi:10.3390/foods11203282), 2022-10-20
Supplement: s1 [file s1]

**Table S1.** Primers used for PCR amplification and Sanger sequencing to verify the mutations of evolved strains, LmSCar (exposed to prolonged sublethal doses of carvacrol) and LmLCar (cyclically exposed to short lethal treatments of carvacrol).

| LmSCar Mutations | Forward Primer (5' → 3') | Reverse Primer (5' → 3') |
|------------------|--------------------------|--------------------------|
| lmo0891          | TTCGGCGATGGACCTTGAAA     | ATCCGGCAACTCTTTTCCGT     |
| lmo2202          | CCGCACCGACAACCTACGATA    | ATTGACCGTCGTGCAGATGT     |
| lmo0785          | CCCCCTTAACGTGTCCGAAA     | TCGCGAGCAATTAGAGCAGA     |
| lmo1539          | GAACCCATGAGTAGCCCCAA     | TCCAAAGCAGAGAATGGCGG     |
| lmo1799          | CAGTCAATGTCTACATCGGCATC  | CGTGGGTTTATTACTACGGATGT  |
| lmo1921          | ATCCAGCGCCTCATCGATTT     | GGAAGAAGGAGAACACGCGA     |

**Table S2.** Genetic variations detected by whole genome sequencing (WGS) between LmWT and the reference genome of *Listeria monocytogenes* EGD-e (NCBI accession: NC\_003210.1). Single nucleotide variation (SNV).

| Genome Position | Locus Tag         | Mutation*   | Change                   | Information                                            |
|-----------------|-------------------|-------------|--------------------------|--------------------------------------------------------|
| 264,578         | lmo0247           | SNV: G147T  | Silent mutation (Gly49)  | Hypothetical protein                                   |
| 435,968         | lmo0412-lmo0413   | SNV: G by T | Non-coding region        | Hypothetical protein - hypothetical protein            |
| 966,277         | lmo0929           | SNV: A33G   | Silent mutation (Leu11)  | Sortase                                                |
| 1,374,715       | lmo1349           | SNV: A597G  | Silent mutation (Leu199) | Glycine dehydrogenase subunit 1                        |
| 1,442,124       | lmo1412- lmo1413  | SNV: C by A | Non-coding region        | Modulates DNA topology – peptidoglycan binding protein |
| 2,229,938       | lmo2144           | SNV: G-11A  | Regulatory region        | GntR family transcriptional regulator                  |
| 2,943,565       | lmo2855 - lmo2856 | SNV: C by A | Regulatory region        | Ribonuclease P – 50S ribosomal protein L34             |

\*Position respect to the start of the coding region.
